# Supplementary material for: A highly selective and sensitive fluorescent turn-on Al3+ chemosensor in aqueous media and living cells: experimental and theoretical studies
Source: Royal Society of Chemistry journal article supplement (doi:10.1039/c5nj02334c), 2015-10-21
Supplement: c5nj02334c1.pdf [file c5nj02334c1.pdf]

## Supplementary Materials

### **A highly selective and sensitive fluorescent turn-on Al<sup>3+</sup> chemosensor in aqueous media and living cells: Experimental and theoretical studies**

In Hong Hwang,<sup>a</sup> Ye Won Choi,<sup>a</sup> Kyung Beom Kim,<sup>a</sup> Gyeong Jin Park,<sup>a</sup> Jae Jun Lee,<sup>a</sup>  
LeTuyen Nguyen,<sup>b</sup> Insup Noh,<sup>b</sup> Cheal Kim<sup>a\*</sup>

<sup>a</sup> *Department of Fine Chemistry and Department of Interdisciplinary Bio IT Materials, Seoul National University of Science and Technology, Seoul 139-743, Korea. Fax: +82-2-973-9149; Tel: +82-2-970-6693; E-mail: [chealkim@seoultech.ac.kr](mailto:chealkim@seoultech.ac.kr)*

<sup>b</sup> *Department of Chemical and Biomolecular Engineering, and Convergence Program of Biomedical Engineering and Biomaterials, Seoul National University of Science & Technology, Seoul 139-743, Republic of Korea.*

**The method of determination of association constant (*K*).** Based on the literatures,<sup>1,2</sup> the association constant (*K*) of sensor **1** (L) with Co<sup>2+</sup> or Cu<sup>2+</sup> (M) can be expressed by the following equations, where (L) and (M) are assumed to form a complex with a complexation ratio of m:n.

$$[M]^m = \frac{1}{nK} \frac{1}{[L]_T^{n-1}} \frac{1-\alpha}{\alpha^n}, \quad \alpha = \frac{[L]}{[L]_T}$$

$\alpha$  is defined as the ratio between the free ligand concentration [L] and the initial concentration of ligand [L]<sub>T</sub>.

## References

- [1] G. Grynkiewicz, M. Poenie, R. Y. Tsien, *J. Biol. Chem.*, 1985, **260**, 3440.
- [2] C.-Y. Li, X.-B. Zhang, Y.-Y. Dong, Q.-J. Ma, Z.-X. Han, Y. Zhao, G.-L. Shen, R.-Q. Yu, *Anal. Chim. Acta*, 2008, **616**, 214.

**Table S1.** Examples for the detection of  $\text{Al}^{3+}$  by organic chemosensors.

| Sensor                                                                              | Analyte                               | Solvent                                          | Method                   | Detection limit<br>( $\text{Zn}^{2+}$ ) | Reference |
|-------------------------------------------------------------------------------------|---------------------------------------|--------------------------------------------------|--------------------------|-----------------------------------------|-----------|
| 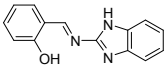   | $\text{Al}^{3+}$ and $\text{Zn}^{2+}$ | MeOH                                             | Fluorescence             | $1.2 \times 10^8$                       | 25        |
| 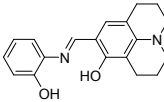   | $\text{Al}^{3+}$ and $\text{Zn}^{2+}$ | Bis-tris buffer                                  | Fluorescence             | $1.0 \times 10^7$                       | 26        |
| 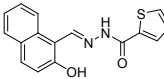   | $\text{Al}^{3+}$                      | $\text{EtOH:H}_2\text{O} = 1 : 4$ (v/v)          | Fluorescence             | $7.1 \times 10^6$                       | 27        |
| 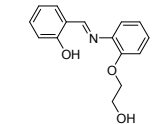  | $\text{Al}^{3+}$                      | $\text{EtOH:H}_2\text{O} = 95 : 5$ (v/v)         | Fluorescence             | $3.1 \times 10^6$                       | 28        |
| 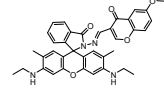 | $\text{Al}^{3+}$ and $\text{Zn}^{2+}$ | $\text{CH}_3\text{CN:H}_2\text{O} = 9 : 1$ (v/v) | Fluorescence/colorimetry | $9.0 \times 10^4$                       | 30        |
| 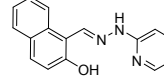 | $\text{Al}^{3+}$                      | $\text{EtOH:H}_2\text{O} = 1 : 9$ (v/v)          | Fluorescence             | $4.9 \times 10^4$                       | 80        |
| 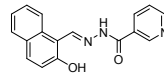 | $\text{Al}^{3+}$ and $\text{Zn}^{2+}$ | Bis-tris buffer                                  | Fluorescence/colorimetry | $4.0 \times 10^3$                       | 81        |
| 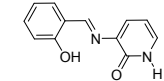 | $\text{Al}^{3+}$                      | DMSO                                             | Fluorescence             | $5.3 \times 10^4$                       | 82        |
| 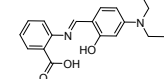 | $\text{Al}^{3+}$                      | Bis-tris buffer:MeOH = 1:1 (v/v)                 | Fluorescence             | $3.1 \times 10^8$                       | This work |

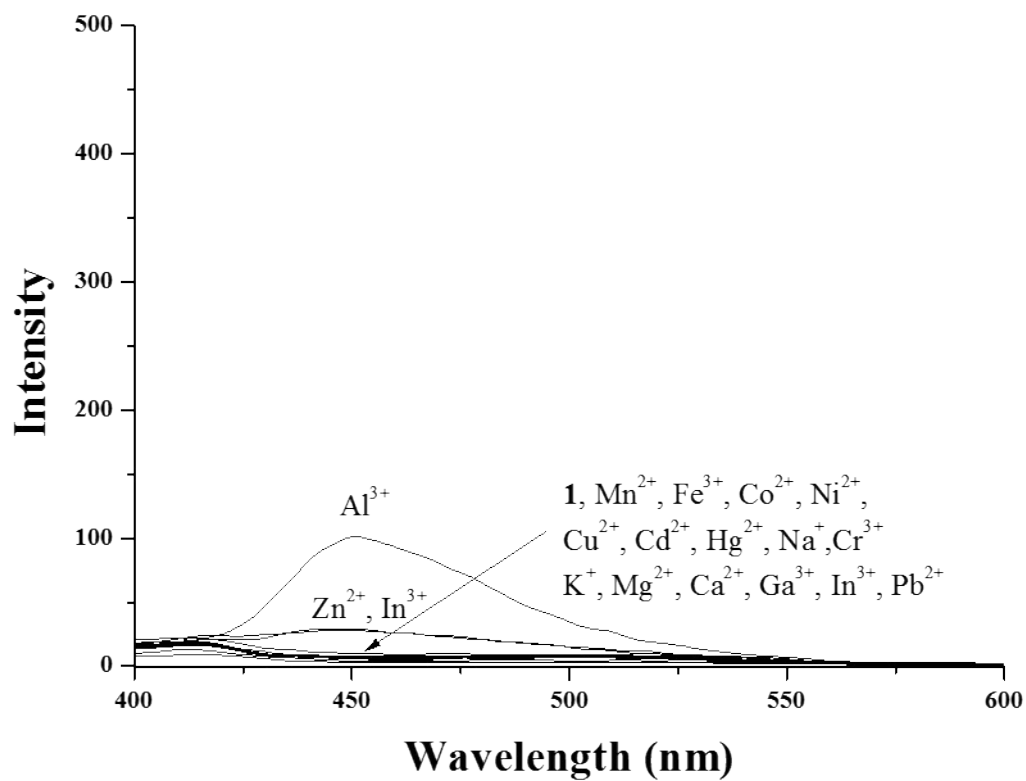

**Fig. S1.** Fluorescence spectra of sensor **1** (10  $\mu$ M) upon addition of metal nitrate salts (20 equiv) of  $\text{Mn}^{2+}$ ,  $\text{Fe}^{3+}$ ,  $\text{Co}^{2+}$ ,  $\text{Ni}^{2+}$ ,  $\text{Cu}^{2+}$ ,  $\text{Zn}^{2+}$ ,  $\text{Cd}^{2+}$ ,  $\text{Hg}^{2+}$ ,  $\text{Na}^+$ ,  $\text{K}^+$ ,  $\text{Mg}^{2+}$ ,  $\text{Ca}^{2+}$ ,  $\text{Al}^{3+}$ ,  $\text{Ga}^{3+}$ ,  $\text{In}^{3+}$ ,  $\text{Pb}^{2+}$  and  $\text{Cr}^{3+}$  with an excitation of 410 nm in bis-tris buffer (10 mM, pH 7.0).

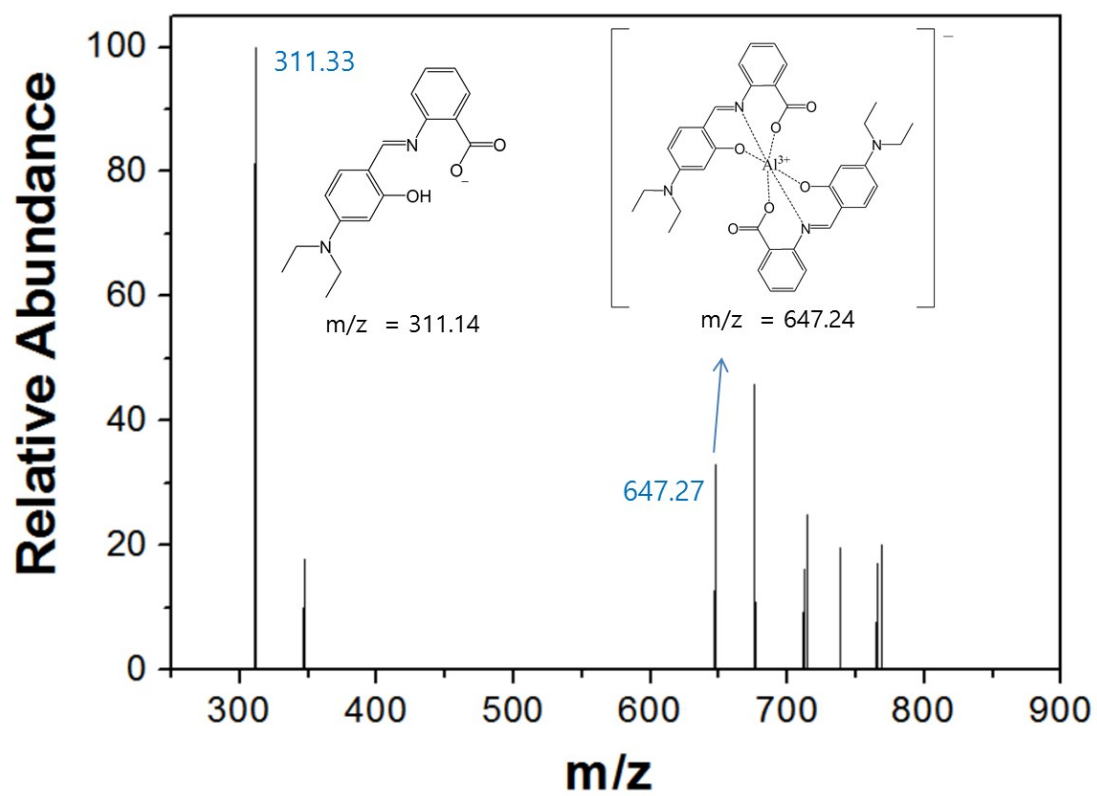

**Fig. S2.** Negative-ion electrospray ionization mass spectrum of **1** upon addition of 0.5 equiv of  $Al^{3+}$ .

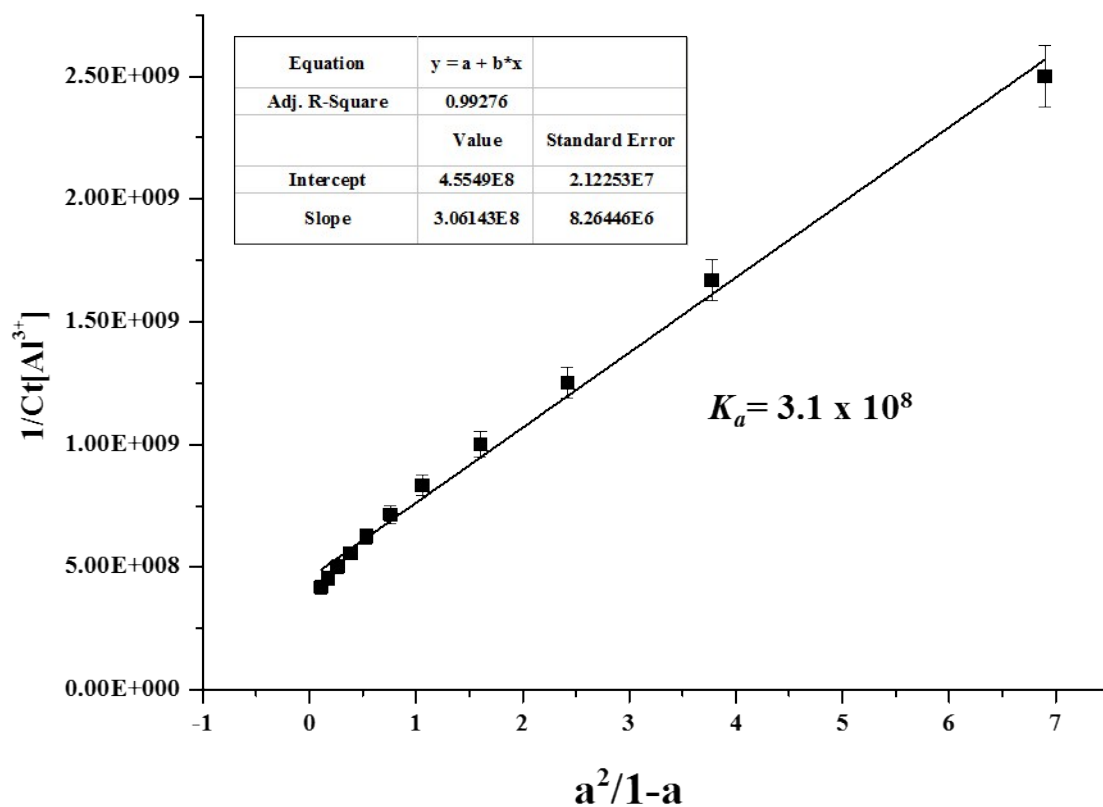

**Fig. S3.** Association constant ( $K_a$ ) of **1** (10  $\mu$ M) for  $\text{Al}^{3+}$  through fluorescent intensity, assuming 2:1 stoichiometry for association between **1** and  $\text{Al}^{3+}$  ( $\lambda_{\text{ex}}$ =410 nm and  $\lambda_{\text{em}}$ =460 nm).

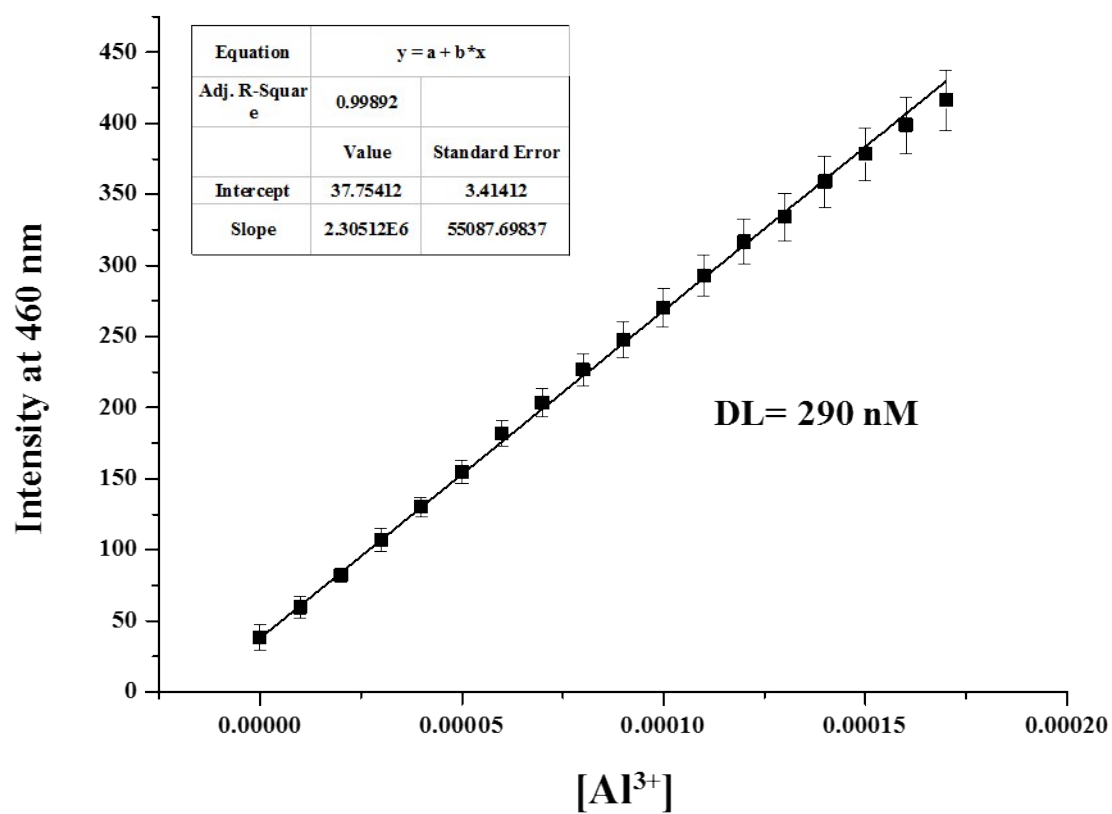

**Fig. S4.** Detection limit (DL) of **1** (10  $\mu\text{M}$ ) for  $\text{Al}^{3+}$  through fluorescent intensity ( $\lambda_{\text{ex}}$ =410 nm and  $\lambda_{\text{em}}$ =460 nm).

(a)

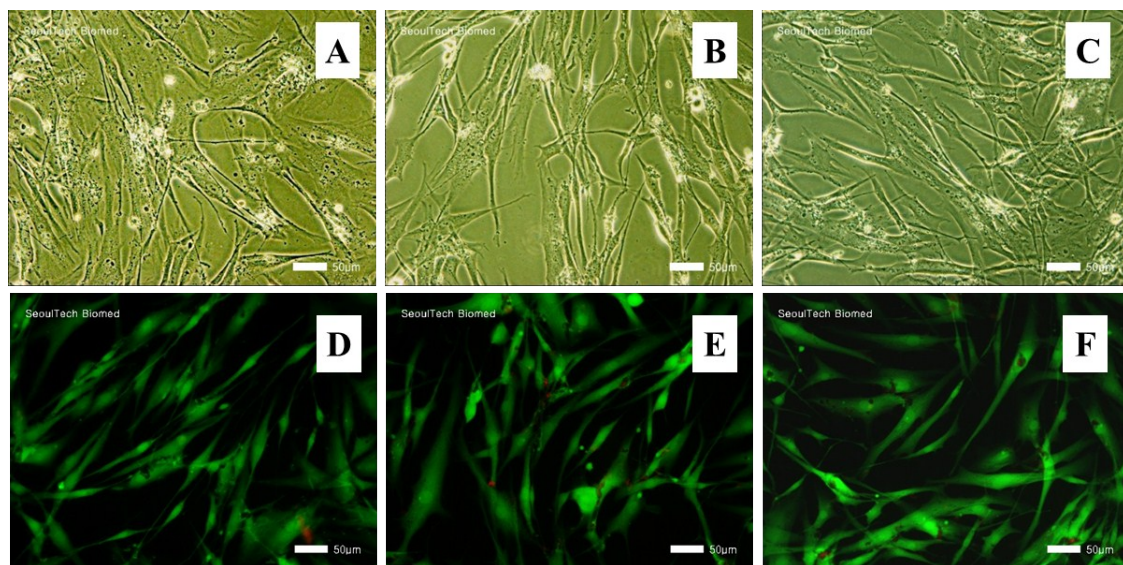

(b)

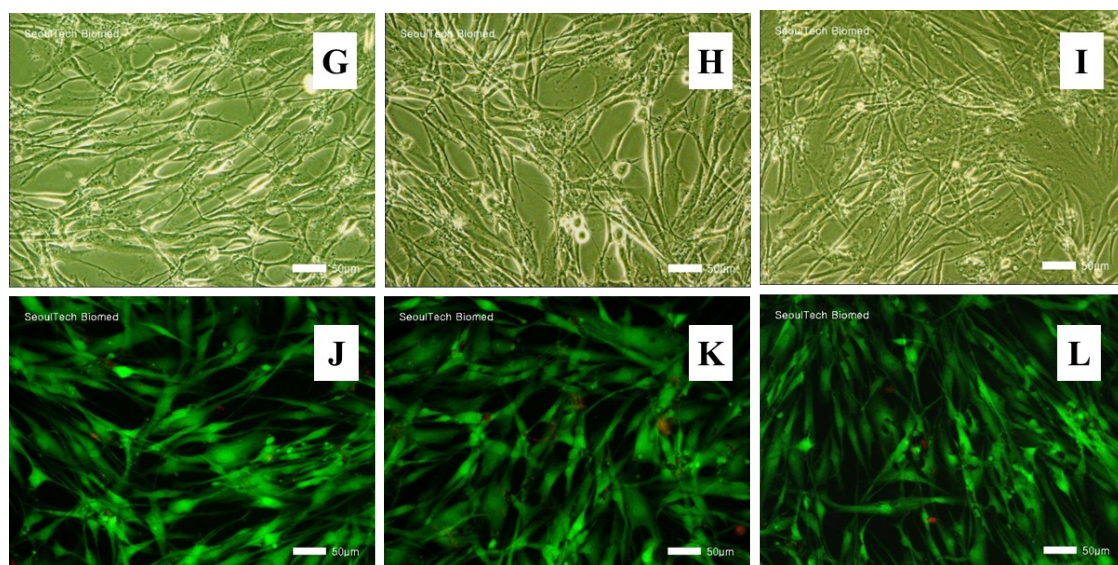

**Fig. S5.** Images of Live/Dead assays using fibroblasts with (a) **1** and (b) **1**-Al<sup>3+</sup> complex, respectively. The cells were incubated with **1** (10  $\mu$ M) or **1**-Al<sup>3+</sup> complex (**1**: 10  $\mu$ M, Al(NO<sub>3</sub>)<sub>3</sub>: 150  $\mu$ M) for 1 h (A, D, G and J), 12 h (B, E, H and K) and 24 h (C, F, I and L).

L). Green color represents cells alive and red color for dead cells.

(a)

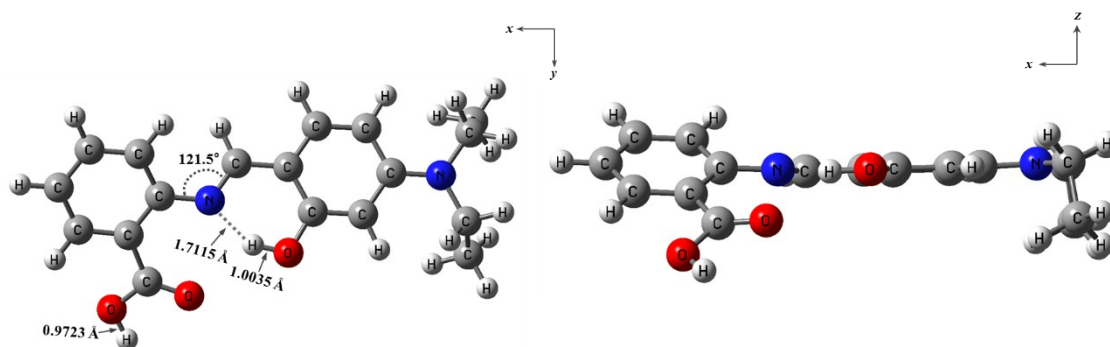

(b)

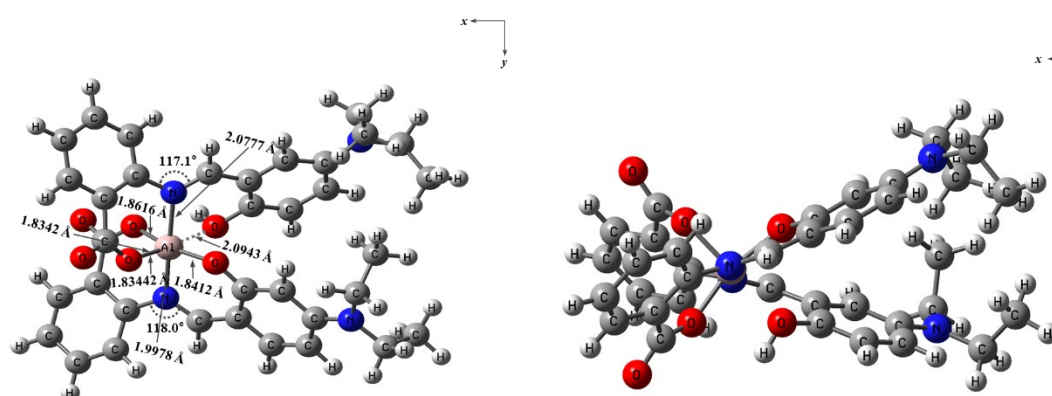

**Fig. S6.** Energy-minimized structures of (a) **1** and (b)  $\text{Al}^{3+}\cdot 2\cdot 1$  from B3LYP level.

(a)

| Excited State 1   | Wavelength | Percent (%) | Oscillator strength |
|-------------------|------------|-------------|---------------------|
| H $\rightarrow$ L | 394.61 nm  | 97%         | 0.8349              |

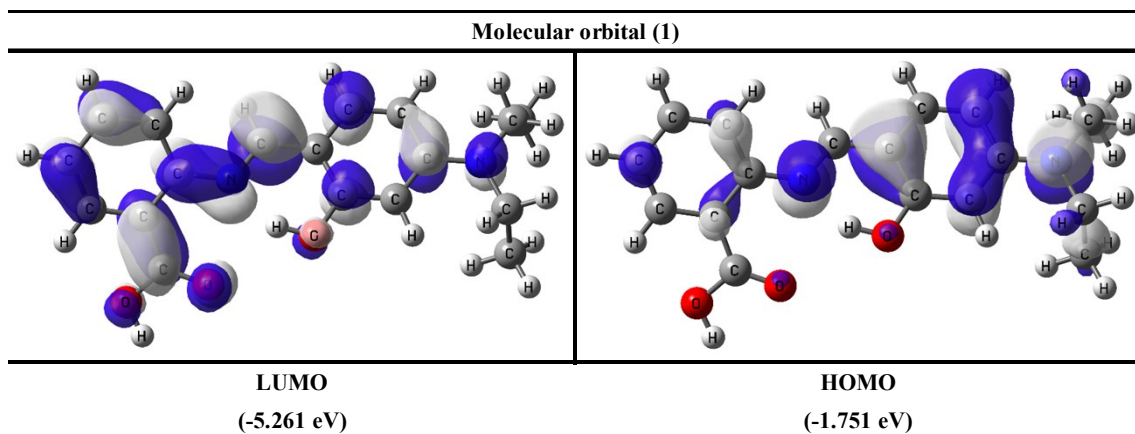

(b)

**Fig. S7.** (a) The major electronic transition energies and molecular orbital contributions for **1** (H = HOMO and L = LUMO). (b) Isosurface (0.030 electron bohr<sup>-3</sup>) of molecular orbitals participating in the major singlet excited states of **1**.

(a)

| Excited State 1       | Wavelength | Percent (%) | Oscillator strength |
|-----------------------|------------|-------------|---------------------|
| H $\rightarrow$ L     | 499.43 nm  | 99%         | 0.0045              |
| Excited State 5       | Wavelength | Percent (%) | Oscillator strength |
| H $\rightarrow$ L+1   | 367.42 nm  | 83%         | 0.9022              |
| H-1 $\rightarrow$ L+1 |            | 12%         |                     |

(b)

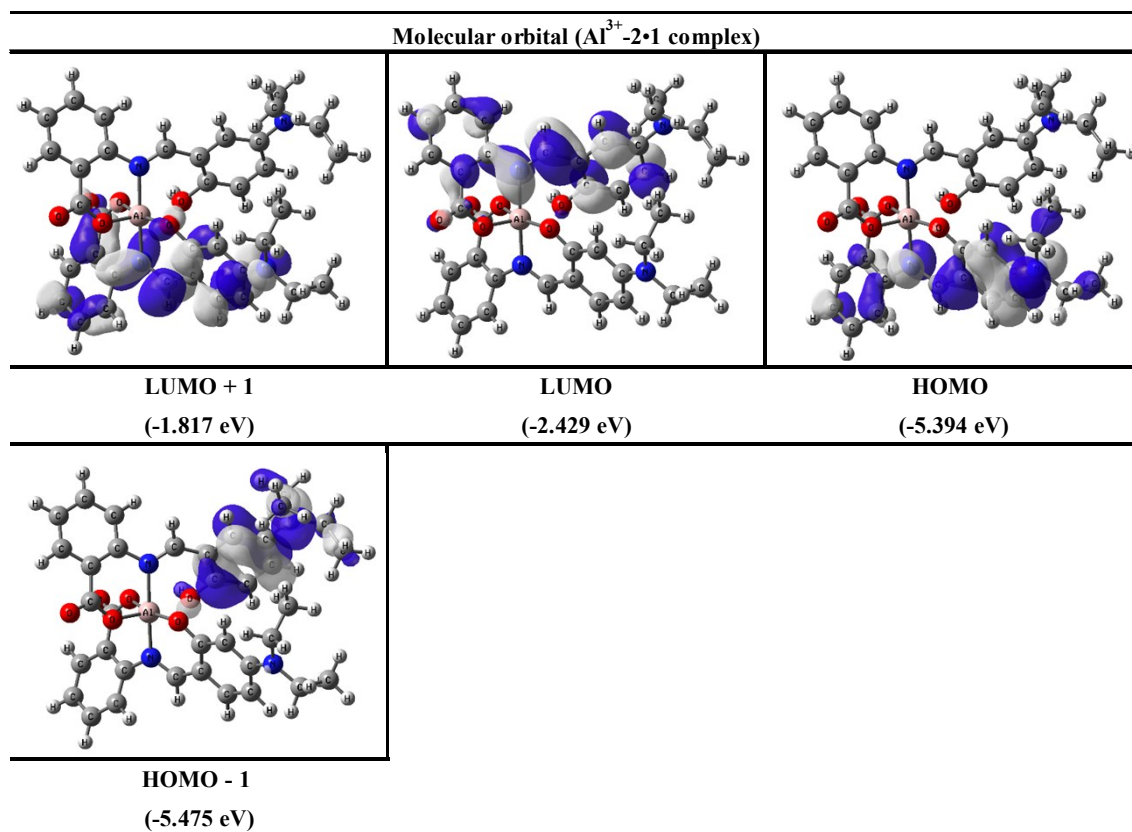

**Fig. S8.** (a) The major electronic transition energies and molecular orbital contributions for  $\text{Al}^{3+}\cdot 2\cdot 1$  (H = HOMO and L = LUMO). (b) Isosurface (0.030 electron bohr<sup>-3</sup>) of molecular orbitals participating in the major singlet excited states of  $\text{Al}^{3+}\cdot 2\cdot 1$ .
